# Supplementary material for: SIMS simultaneous measurement of oxygen–hydrogen isotopes and water content for hydrous geological samples
Source: Royal Society of Chemistry journal article supplement (doi:10.1039/d1ja00031d), 2021-01-01
Supplement: d1ja00031d1.xlsx [file d1ja00031d1.xlsx]

## Sheet: Protocol 1 Session 1
	Ip (nA)	1H/Coeff	2H/Coeff	16O/Coeff	18O/Coeff	18O/16O	δ18Oraw	2SE (‰)	IMF	2H/1H	δDraw	2SE (‰)	IMF	1H/16O	2SE (%)	2RSE (%)
Kovdor
1	4.32911	3086235	503.804	2648498000	5391101	0.00203553	15.1257	0.139144	8.57567	0.000163243	48.0444	12.0343	114.044	0.00116541	8.97949e-06	0.770502
2	4.27818	3038907	483.305	2622414000	5337871	0.00203537	15.0444	0.16995	8.49438	0.000159205	22.1199	11.4547	88.1199	0.00115791	8.29545e-06	0.716416
3	4.22921	3036367	486.547	2599503000	5289588	0.00203493	14.8289	0.148767	8.27894	0.000160229	28.689	11.4549	94.689	0.00116814	9.65238e-06	0.8263
4	4.22968	2922476	475.424	2582573000	5258700	0.00203625	15.4827	0.176848	8.93274	0.000163083	47.0166	12.3816	113.017	0.00112979	5.59767e-06	0.49546
5	4.22099	3000785	483.731	2583961000	5258961	0.00203528	15.003	0.108691	8.45299	0.000161128	34.4633	11.4621	100.463	0.00116158	8.82817e-06	0.760012
6	4.05522	3009379	475.009	2514942000	5117955	0.00203503	14.8763	0.248953	8.32632	0.000158327	16.4792	11.5932	82.4792	0.00119552	1.10239e-05	0.922104
7	4.13603	2976486	478.76	2541447000	5174198	0.00203582	15.2693	0.17418	8.7193	0.000161334	35.789	11.5304	101.789	0.00117131	9.97234e-06	0.851382
8	4.13549	3071405	491.613	2570171000	5229839	0.00203482	14.7701	0.234921	8.2201	0.000160141	28.1247	11.3755	94.1247	0.00119518	1.24142e-05	1.03869
						Mean	15.0501		8.50006		32.5908		98.5908	0.00116811
						2SD			0.478511				22.2331	3.61267
Durango
1	4.27544	182609	27.7028	2466060000	5033401	0.00204107	17.888	0.182617	8.08799	0.000151416	-27.8903	51.3017	92.1097	7.40267e-05	4.67917e-07	0.632093
2	4.3083	175354	27.794	2469757000	5043338	0.00204184	18.274	0.159742	8.47399	0.000158492	17.5424	51.2176	137.542	7.08429e-05	4.87553e-07	0.688217
3	4.24376	173004	26.5834	2423592000	4947600	0.0020413	18.0037	0.155355	8.20369	0.00015363	-13.6768	53.9601	106.323	7.11888e-05	4.56372e-07	0.641073
4	4.21771	173482	28.1155	2428456000	4957781	0.00204164	18.1728	0.125303	8.37275	0.000161838	39.019	49.9889	159.019	7.1389e-05	2.82123e-07	0.395191
5	4.16521	168008	26.0089	2391959000	4885923	0.00204248	18.5932	0.187075	8.79316	0.000154624	-7.29456	59.0606	112.705	7.02128e-05	2.89074e-07	0.411712
6	4.17773	166049	25.327	2405333000	4915207	0.00204357	19.1372	0.230415	9.33724	0.000152012	-24.0633	53.5657	95.9367	6.89727e-05	4.03825e-07	0.585486
7	4.13572	172626	27.5569	2355509000	4808398	0.00204145	18.0785	0.148908	8.2785	0.000159668	25.0918	58.8962	145.092	7.33553e-05	1.99922e-07	0.272539
8	4.10067	170876	26.2121	2370755000	4838137	0.00204073	17.7194	0.167764	7.91943	0.000153209	-16.3746	48.8559	103.625	7.19987e-05	5.41854e-07	0.752588
						Mean	18.1042		8.30421		-0.955797		119.044	7.14984e-05
						2SD			0.564603				49.6721	4.56709
LBS5H
1	4.0409	1222996	190.292	2777685000	5630439	0.00202691	10.8273	0.174176		0.000155607	-0.980354	18.2755		0.000440306	9.49265e-07	0.215592
2	4.03504	1203803	192.314	2795204000	5668637	0.00202799	11.3645	0.104763		0.000159752	25.6285	18.9154		0.00043069	1.29215e-06	0.300019
3	3.93952	1206281	189.984	2756169000	5586962	0.00202708	10.9091	0.161516		0.000157496	11.1473	20.2074		0.000437701	1.3972e-06	0.319213
4	3.91346	1201026	190.271	2759053000	5594948	0.00202785	11.2976	0.142329		0.000158405	16.9819	20.0011		0.00043563	4.98491e-07	0.11443
5	3.8508	1204875	188.691	2713595000	5498894	0.00202654	10.6403	0.174431		0.000156594	5.35182	18.3934		0.000444534	8.36802e-07	0.188243
6	3.87474	1184232	182.717	2725845000	5526960	0.00202753	11.1336	0.145688		0.000154317	-9.26168	18.6571		0.00043447	1.14561e-06	0.26368
7	3.87364	1218347	193.527	2709280000	5488613	0.00202586	10.3022	0.194187		0.000159052	21.1332	18.1144		0.000449706	8.53952e-07	0.189891
8	3.88546	1166691	184.59	2714123000	5505050	0.00202812	11.4323	0.198048		0.000158221	15.8006	18.5966		0.000429896	1.69444e-06	0.394151
						Mean	10.9884				10.7252			0.000437867
						2SD	0.785349				23.4324			3.09871
LBS6H-
1	4.04278	840921	124.398	2949412000	5975048	0.00202585	10.2977	0.199291		0.000146491	-59.5076	27.2271		0.000285802	4.97166e-07	0.173954
2	4.01775	638488	92.5403	2972497000	6022081	0.00202593	10.3381	0.191593		0.000145023	-68.9304	26.263		0.00021498	5.59232e-06	2.60132
3	3.97667	841315	126.309	2941551000	5957236	0.00202513	9.94115	0.102201		0.000149716	-38.802	22.4805		0.000286573	5.13068e-07	0.179035
4	3.94405	840085	122.048	2952002000	5980556	0.00202593	10.3401	0.141932		0.000144349	-73.2621	22.8695		0.000284394	5.86635e-07	0.206276
5	3.87607	810777	118.389	2868644000	5810752	0.00202561	10.1775	0.164295		0.000145839	-63.6909	23.2967		0.000282629	5.58994e-07	0.197783
6	3.85901	827913	122.508	2884610000	5841121	0.00202492	9.83593	0.15599		0.000148102	-49.1673	24.0938		0.000287008	6.79037e-07	0.236592
7	3.86152	810625	120.803	2879620000	5833739	0.00202579	10.2703	0.10804		0.000148612	-45.8918	22.987		0.000282097	4.27006e-07	0.151369
8	3.86316	842206	120.108	2903409000	5879642	0.0020252	9.97606	0.130748		0.000142223	-86.9081	22.9763		0.000290715	4.4473e-07	0.152978
						Mean	10.1471				-59.6042			0.000285603
						2SD	0.400737				33.4509			2.05527
LBS7H
1	4.13314	2486106	352.269	2788071000	5646044	0.00202508	9.91223	0.210576		0.000141685	-90.3621	13.462		0.000890771	2.47227e-06	0.277542
2	4.05804	2429142	351.056	2795126000	5663479	0.00202633	10.5396	0.161857		0.00014499	-69.1429	13.4852		0.000868242	1.16144e-06	0.133769
3	3.98528	2499991	352.655	2767224000	5601962	0.0020244	9.5756	0.172973		0.000141763	-89.8645	13.7112		0.000903397	1.88377e-06	0.20852
4	3.9748	2558554	362.897	2710813000	5489725	0.00202513	9.93816	0.130802		0.000141834	-89.4055	13.2634		0.000943705	4.13299e-06	0.437954
5	3.90854	2366108	342.475	2722573000	5517073	0.0020263	10.5216	0.179214		0.000144414	-72.846	13.6206		0.000870357	3.46428e-06	0.39803
6	3.86504	2346507	339.411	2677321000	5426081	0.00202668	10.7141	0.130821		0.000144352	-73.2409	13.7474		0.00087653	3.11666e-06	0.355568
7	3.88374	2321826	339.214	2705967000	5482361	0.00202603	10.3865	0.153976		0.000146345	-60.4443	13.7186		0.000858697	2.33453e-06	0.271869
8	3.87435	2329437	337.379	2736862000	5545288	0.00202606	10.402	0.144806		0.000144588	-71.7264	13.7558		0.000852593	1.88149e-06	0.220678
						Mean	10.2487				-77.9009			0.00087437
						2SD	0.785926				22.5873			4.05937

## Sheet: Protocol 1 Session 2
	Ip (nA)	1H/Coeff	2H/Coeff	16O/Coeff	18O/Coeff	18O/16O	δ18Oraw	2SE (‰)	IMF	2H/1H	δDraw	2SE (‰)	IMF	1H/16O	2SE (%)	2RSE (%)
Kovdor
1	4.04043	3017803	508.054	2598908000	5290675	0.00203582	15.2713	0.0969822	8.72129	0.000168563	82.197	10.5399	148.197	0.00116131	1.09058e-05	0.939097
2	4.00726	3061153	512.368	2575618000	5241747	0.00203515	14.9382	0.153312	8.38816	0.00016761	76.0799	9.95993	142.08	0.00118808	1.10039e-05	0.926191
3	4.01548	3126613	516.171	2587118000	5266192	0.00203554	15.1282	0.163485	8.57817	0.000165731	64.0171	10.5906	130.017	0.00120816	1.13722e-05	0.941288
4	4.01415	3088269	513.534	2584947000	5262037	0.00203564	15.1825	0.181099	8.63253	0.000166267	67.4551	9.97279	133.455	0.00119487	1.34747e-05	1.12772
5	3.9985	3141567	526.314	2605541000	5303334	0.00203552	15.1187	0.194831	8.56869	0.00016752	75.5021	9.85098	141.502	0.00120591	1.81893e-05	1.50835
6	3.98591	3196102	523.492	2608622000	5308399	0.00203492	14.8235	0.107766	8.27346	0.000163398	49.0389	9.87747	115.039	0.00122538	1.66478e-05	1.35858
7	3.96502	3123224	517.403	2598336000	5289029	0.00203554	15.1317	0.27234	8.58166	0.000165636	63.4078	11.2907	129.408	0.0012021	1.6178e-05	1.34582
8	3.97112	3079038	511.226	2581081000	5254940	0.0020358	15.2598	0.144178	8.70982	0.00016622	67.1559	13.6074	133.156	0.00119308	1.50294e-05	1.25972
						Mean	15.1067		8.55672		68.1067		134.107	0.00119736
						2SD	0.308125		0.308125				20.2909	3.0979
Durango									1.90688
1	4.02182	177260	28.6549	2409328000	4917997	0.00204112	17.9149	0.143143	8.11492	0.000161831	38.9786	42.2037	158.979	7.34918e-05	3.83288e-07	0.521539
2	4.02025	175584	28.0293	2401871000	4901969	0.00204089	17.8007	0.123296	8.00072	0.00015778	12.9661	42.6717	132.966	7.31097e-05	6.21384e-07	0.849934
3	4.02197	180892	29.0217	2402717000	4904827	0.00204114	17.9249	0.154209	8.1249	0.000160678	31.5723	41.6691	151.572	7.51196e-05	6.73284e-07	0.896282
4	4.001	182010	29.4081	2396397000	4891782	0.00204139	18.0476	0.100823	8.24758	0.000161492	36.7996	41.6601	156.8	7.59195e-05	5.80078e-07	0.764069
5	4.01423	187403	31.1061	2439481000	4979379	0.00204107	17.888	0.160227	8.08799	0.000165946	65.3974	40.5079	185.397	7.68284e-05	7.17645e-07	0.934089
6	4.01431	185898	30.0431	2412508000	4923139	0.00204067	17.688	0.16383	7.88801	0.000161813	38.8591	45.544	158.859	7.70603e-05	6.30126e-07	0.817705
7	4.00562	185877	29.183	2405358000	4909731	0.00204073	17.7204	0.182772	7.92043	0.000157005	7.99242	42.0634	127.992	7.72757e-05	5.80797e-07	0.75159
8	4.00421	178816	29.3315	2412198000	4927210	0.0020417	18.2017	0.147848	8.40168	0.000163364	48.8174	45.5945	168.817	7.42247e-05	5.58234e-07	0.752087
						Mean	17.8983		8.09828		35.1729		155.173	7.53787e-05
						2SD			0.338731				36.8417	4.36303
LBS5H
1	3.88859	1279628	201.851	2745740000	5558362	0.00202437	9.55765	0.16015		0.000156803	6.69492	15.9063		0.000467131	2.77761e-06	0.59461
2	3.83735	1197976	194.74	2719222000	5510612	0.0020266	10.6728	0.105273		0.0001623	41.9877	16.3997		0.000442745	1.22677e-06	0.277083
3	3.57018	1178353	186.406	2609987000	5286682	0.00202549	10.1182	0.127221		0.000158387	16.8631	16.4695		0.00045271	1.4423e-06	0.318592
4	3.50916	1163042	184.361	2557045000	5178580	0.00202514	9.94514	0.113152		0.000157893	13.6909	16.584		0.00045661	1.3756e-06	0.301264
5	3.44486	1130843	183.696	2515055000	5093226	0.00202518	9.96409	0.154353		0.0001615	36.8535	16.6737		0.000452976	1.52148e-06	0.335885
6	3.40786	1163767	186.014	2528321000	5120442	0.00202533	10.0389	0.101532		0.00016056	30.8173	18.5608		0.000461492	1.18294e-06	0.256329
7	3.46387	1128548	181.432	2524724000	5115377	0.00202611	10.4284	0.121455		0.000161308	35.617	18.9067		0.00044718	2.20863e-06	0.493901
8	3.40113	1183794	187.641	2501889000	5066738	0.00202526	10.006	0.132424		0.000159396	23.3442	17.4331		0.000472486	2.04438e-06	0.432685
						Mean	10.0914				25.7336			0.000456666
						2SD	0.669663				25.1085			4.36741
LBS6H-
1	3.93623	952380	145.168	3054085000	6183706	0.00202474	9.74367	0.156657		0.000152322	-22.0737	18.5588		0.000313636	2.96622e-06	0.945753
2	3.92872	594881	87.8031	2942595000	5954179	0.00202345	9.10034	0.165744		0.000149376	-40.9881	23.9577		0.00020225	8.20878e-06	4.05872
3	3.87693	929425	139.395	3048601000	6170256	0.00202398	9.36615	0.146794		0.000147599	-52.3941	20.7174		0.000305454	7.12259e-06	2.33181
4	3.86254	950834	148.658	3057833000	6194306	0.00202565	10.1965	0.128015		0.000158624	18.3873	20.7992		0.000311627	2.61022e-06	0.83761
5	3.68386	867593	129.309	2875333000	5819267	0.00202379	9.2699	0.107068		0.000147767	-51.3174	25.4136		0.000304294	2.59522e-06	0.852866
6	3.64536	847332	128.281	2868609000	5808359	0.0020248	9.77459	0.113903		0.000152435	-21.3495	19.8374		0.000295988	3.8553e-06	1.30252
7	3.45166	862650	128.77	2755533000	5581066	0.0020254	10.0728	0.105047		0.000151305	-28.6049	19.7704		0.000313286	1.38409e-06	0.441796
10	3.54296	870663	132.675	2801218000	5671353	0.0020246	9.67385	0.110833		0.000153002	-17.7074	19.5101		0.000311463	2.46645e-06	0.791893
						Mean	9.64972				-25.0085			0.000307964
						2SD	0.766983				47.7044			4.18668
LBS7H
1	3.92778	2586802	388.916	2824344000	5723992	0.00202678	10.762	0.106008		0.000149655	-39.1956	12.7601		0.000922814	7.53429e-06	0.816447
2	3.91229	2455571	370.68	2847943000	5773346	0.00202731	11.0268	0.183224		0.000151963	-24.3798	13.9576		0.000864526	3.72647e-06	0.431042
3	3.93138	2334211	341.53	2803990000	5680818	0.00202598	10.3611	0.170629		0.000147006	-56.2006	12.256		0.000833695	7.5708e-06	0.908102
4	3.62714	2286074	324.127	2516500000	5098031	0.00202573	10.2399	0.159953		0.000141952	-88.6524	17.5221		0.000909836	6.44257e-06	0.708102
5	3.48006	714353	105.192	2398465000	4859123	0.00202601	10.377	0.138858		0.000147956	-50.1008	22.0328		0.00029842	1.59923e-05	5.35899
6	3.47427	2176083	321.162	2398465000	4859123	0.002026	10.3745	0.154951		0.000147218	-54.8421	23.6845		0.000881728	6.98233e-06	0.791892
7	3.44282	2362133	347.363	2557284000	5179379	0.00202534	10.0459	0.156984		0.000147291	-54.3734	12.082		0.000926387	3.92923e-06	0.424146
8	3.44721	2.21534e+06	327.139	2552911000	5170587	0.00202538	10.0643	0.170909		0.000147707	-51.7039	13.1045		0.00086979	6.29163e-06	0.72335
						Mean	10.4064				-52.764			0.000886968
						2SD	0.671905				39.1372			7.71611

## Sheet: Protocol 2 Session 3
	Ip (nA)	16O/Coeff	18O/Coeff	16O1H/Coeff	17O1H/Coeff	16O2H/Coeff	18O/16O	δ18Oraw	2SE (‰)	IMF	16O2H/16O1H	δDraw	2SE (‰)	IMF	16O1H/16O	2SE (%)	2RSE (%)
Kovdor
1	3.16111	293432400	595497	1793865	729.963	407.082	0.00202921	11.9724	0.310765	5.42237	0.000228167	464.859	9.13149	530.859	0.00610956	4.99014e-05	0.816775
2	3.1529	289122500	586476	1759376	715.543	401.913	0.00202847	11.6028	0.350111	5.05283	0.000229022	470.353	9.17472	536.353	0.00608386	3.32358e-05	0.546295
3	3.15141	290121100	588574	1770207	722.113	398.537	0.00202886	11.7993	0.372821	5.24932	0.000225228	445.993	16.2269	511.993	0.00609777	5.57988e-05	0.915069
4	3.1263	286674400	581322	1694277	697.472	381.26	0.00202775	11.2478	0.299094	4.69776	0.000225042	444.798	9.73834	510.798	0.00590423	3.9313e-05	0.665844
5	3.10095	288492600	584844	1726840	694.725	389.722	0.00202694	10.8418	0.363308	4.29181	0.000225845	449.958	9.80636	515.958	0.00599637	4.76821e-05	0.795183
6	3.10612	286178800	580577	1691416	688.866	382.678	0.00202867	11.7066	0.345098	5.15656	0.000225697	449.007	10.7572	515.007	0.0059102	4.3845e-05	0.741852
7	3.08789	287070900	581894	1691035	682.791	386.063	0.00202812	11.4328	0.428167	4.88277	0.000228175	464.917	12.1898	530.917	0.00589029	4.69552e-05	0.797164
							Mean	11.6269		5.07694		455.698		522.655	0.0059989
							2SD			0.519569				21.2036	3.27433
Durango
1	3.24216	286657400	583462	88727.6	35.6383	19.2786	0.00203539	15.0569	0.436819	5.25685	0.000217254	394.799	41.7552	514.799	0.000309801	2.37272e-06	0.765888
2	3.23708	286410400	582917	89413.1	35.0961	19.2249	0.00203503	14.8738	0.404528	5.07383	0.000215474	383.369	42.2834	503.369	0.000312144	2.62735e-06	0.841712
3	3.23575	286759700	584401	88562	36.2653	20.0585	0.00203595	15.3331	0.389688	5.53313	0.00022649	454.099	41.9003	574.099	0.000308813	2.30294e-06	0.745741
4	3.22464	284251900	578493	87536.3	34.3569	18.9095	0.00203494	14.8294	0.379854	5.02944	0.000216251	388.358	53.0495	508.358	0.000307928	2.4502e-06	0.795706
5	3.21744	280895500	571551	86353.7	33.6178	19.2965	0.00203475	14.7377	0.385604	4.93768	0.000224136	438.982	42.1895	558.982	0.00030694	1.39403e-06	0.454171
6	3.23105	278163700	565751	85472.2	34.0396	18.8414	0.00203369	14.2081	0.399065	4.40806	0.000219794	411.109	42.493	531.109	0.00030772	2.08716e-06	0.678267
7	3.21204	279390400	568302	86577.8	34.9489	18.8244	0.00203374	14.235	0.302592	4.43499	0.000217501	396.387	45.1441	516.387	0.000309337	2.02898e-06	0.655911
							Mean	14.9662		5.1102		409.586		529.586	0.000308955
							2SD			0.471502				54.0285	1.11143
LBS5H
1	3.2977	290160500	585914	189521	73.058	48.3512	0.00201927	7.01476	0.298179		0.000256138	644.442	26.3597		0.000653454	2.21092e-05	3.38343
2	3.30201	285664500	576858	249405	98.2182	62.1932	0.00201909	6.92948	0.303994		0.000249519	601.944	24.2048		0.000871644	6.36162e-06	0.729842
3	3.28073	287173000	579808	248032	92.4798	60.8493	0.00201904	6.90106	0.365994		0.000244233	568.009	23.5681		0.000864694	5.28429e-06	0.611116
4	3.27877	279235800	563680	238568	92.5336	60.7763	0.00201856	6.66018	0.303464		0.000253742	629.06	26.9233		0.000854298	4.51425e-06	0.528417
5	3.26336	282694600	570788	246954	97.3581	62.2649	0.00201789	6.32655	0.313863		0.000251597	615.285	23.4722		0.000874722	5.35005e-06	0.611628
6	3.25476	282220500	569542	239862	93.098	59.9762	0.00201831	6.53601	0.410119		0.000248518	595.518	23.8258		0.000849742	5.74617e-06	0.676225
7	3.26297	287412200	580475	247082	95.9235	61.7466	0.00201986	7.309	0.375248		0.000249249	600.211	24.5367		0.000860703	4.84822e-06	0.563286
							Mean	6.81101				607.781			0.000862634
							2SD	0.655605				49.5089			2.25013
LBS6H-
1	3.23066	313651000	633364	171568	66.395	40.3954	0.00202148	8.1164	0.365415		0.000235359	511.039	28.9481		0.00054754	1.69163e-06	0.308951
2	3.22088	309417800	625259	169292	63.2235	40.0371	0.00202097	7.86306	0.289015		0.000236257	516.804	29.2874		0.000547235	1.87115e-06	0.341928
3	3.20132	312228800	631287	172308	67.3002	40.4004	0.00202201	8.3842	0.287689		0.000234429	505.064	34.9499		0.000551487	1.47698e-06	0.267818
4	3.20226	307634400	622054	166818	63.6401	39.5956	0.00202209	8.4221	0.424511		0.000237696	526.039	29.3063		0.000542613	2.60088e-06	0.479325
5	3.19741	315203300	636981	175032	67.2148	41.6945	0.00202086	7.8092	0.286453		0.000238279	529.784	28.685		0.000555159	1.70081e-06	0.306365
6	3.18677	319865400	646120	117521	45.571	27.5229	0.00202049	7.62468	0.360055		0.000233921	501.807	35.1643		0.000367317	1.37879e-05	3.75369
7	3.1874	312196500	631482	170725	67.954	41.1122	0.0020217	8.2311	0.287727		0.000240369	543.202	28.691		0.000547564	2.67041e-06	0.48769
							Mean	8.06439				519.105			0.0005486
							2SD	0.610869				29.5469			1.5575
LBS7H
1	3.26633	314358600	635597	500221	192.586	115.017	0.0020219	8.32735	0.286408		0.000229233	471.706	18.2996		0.00158923	7.98619e-06	0.502519
2	3.27517	313541700	633419	501671	194.185	114.372	0.00202021	7.48354	0.287224		0.000227035	457.595	18.8829		0.00160207	5.6595e-06	0.353263
3	3.27032	296743000	600257	514697	198.002	120.778	0.0020229	8.82705	0.294617		0.000234141	503.216	16.8496		0.00173891	4.87474e-06	0.280334
4	3.25851	295394700	597398	498866	192.544	112.329	0.00202034	7.54887	0.348681		0.000225157	445.536	17.4108		0.0016886	1.33203e-05	0.788836
5	3.26234	299111200	604877	493150	194.32	114.614	0.00202203	8.39368	0.414829		0.000231549	486.577	17.2707		0.00164772	1.00642e-05	0.610793
6	3.25389	303748000	613743	505877	197.51	118.977	0.00202078	7.7703	0.329199		0.00023703	521.764	18.2422		0.00166467	9.85552e-06	0.592042
7	3.24028	309442700	625275	504707	195.174	116.907	0.00202082	7.79025	0.296933		0.000232545	492.973	17.0349		0.00163095	7.44648e-06	0.456574
							Mean	8.02015				481.066			0.00165173
							2SD	1.00343				52.9132			6.2424
San Carlos
1	3.25257	336265700	679241	1751.44	0.719678	0.372062	0.0020199	7.32994	0.277884		0.000187467	203.566	294.932		5.21364e-06	2.64325e-07	5.06988
2	3.25781	332968700	672695	1702.84	0.598729	0.355039	0.0020199	7.32944	0.279064		0.000205358	318.428	318.984		5.11578e-06	2.36694e-07	4.62675
3	3.20086	330649600	668158	1817	0.886991	0.338913	0.00202074	7.75185	0.279973		0.000177281	138.167	294.931		5.49385e-06	3.10483e-07	5.65146
4	3.08883	310325100	626926	1703.65	0.813749	0.410586	0.00202022	7.49252	0.288536		0.000242531	557.08	262.669		5.48396e-06	3.08635e-07	5.62796
5	3.31648	341261300	689359	1683.94	0.988453	0.440152	0.00201985	7.30501	0.275833		0.000235393	511.256	280.439		4.93415e-06	2.48657e-07	5.03951
6	3.25241	328416700	663210	1595.12	0.531535	0.320995	0.00201988	7.32097	0.315465		0.000195727	256.592	316.277		4.85874e-06	2.0371e-07	4.19266
7	3.23723	326373900	659352	1608.01	0.773433	0.338913	0.00202044	7.60074	0.281629		0.000208359	337.694	378.372		4.92026e-06	2.33099e-07	4.73753
							Mean	7.44721				331.826			5.14577e-06
							2SD	0.348527				308.505			10.2717

## Sheet: Protocol 2 Session 4
	Ip (nA)	16O/Coeff	18O/Coeff	16O1H/Coeff	17O1H/Coeff	16O2H/Coeff	18O/16O	δ18Oraw	2SE (‰)	IMF	16O2H/16O1H	δDraw	2SE (‰)	IMF	16O1H/16O	2SE (%)	2RSE (%)
Kovdor
1	2.90232	268678000	544379	1661826	671.166	371.712	0.002026	10.3705	0.308926	3.82054	0.000223403	434.275	10.3607	500.275	0.00617437	3.56974e-05	0.578154
2	2.9078	267614700	542296	1661357	671.095	373	0.00202616	10.4543	0.309651	3.90432	0.000222586	429.031	13.0947	495.031	0.00621957	3.63005e-05	0.583649
3	2.93588	265986000	538974	1673390	678.665	379.164	0.00202655	10.6473	0.337616	4.09732	0.00022765	461.543	11.0975	527.543	0.00628008	4.08901e-05	0.651108
4	2.91038	265863900	538646	1639209	665.797	367.911	0.00202602	10.38	0.412626	3.83	0.000224281	439.914	9.63502	505.914	0.00616564	3.89723e-05	0.632089
5	2.9067	269405000	545680	1677516	680.568	378.17	0.0020268	10.772	0.370303	4.22199	0.00022385	437.148	10.5317	503.148	0.00622638	4.38877e-05	0.704866
6	2.90248	262568600	532711	1627831	652.19	366.043	0.00202705	10.8992	0.312172	4.34916	0.000224607	442.008	10.2086	508.008	0.00619334	2.62154e-05	0.423284
7	2.89505	257191500	521241	1576312	631.644	357.055	0.00202666	10.7039	0.315545	4.15385	0.000226019	451.073	9.7662	517.073	0.00612886	3.89144e-05	0.634937
							Mean	10.6039		4.05388		442.142		508.142	0.00619832
							2SD			0.411724				21.9073	1.58164
Durango
1	2.91202	249746500	507563	74521.3	29.2677	16.5282	0.00203333	14.0286	0.319663	4.22859	0.000221403	421.436	45.114	541.436	0.000298676	1.55661e-06	0.52117
2	2.892	274780700	558427	84562.1	33.1071	19.0009	0.00203237	13.5508	0.30505	3.75077	0.000222184	426.45	45.8571	546.45	0.000307519	2.00741e-06	0.652776
3	3.33369	273493000	556314	80571.9	32.753	18.0512	0.00203298	13.852	0.316264	4.05198	0.000224421	440.812	43.7342	560.812	0.000294449	2.46718e-06	0.837895
4	3.31679	276026400	561323	81593.2	31.5019	18.152	0.00203376	14.2445	0.314569	4.44446	0.000222093	425.867	52.5017	545.867	0.000296106	2.17457e-06	0.734388
5	2.89247	248771600	505900	75586.5	30.0297	16.6984	0.00203338	14.0535	0.44821	4.25346	0.000221007	418.895	45.4151	538.895	0.000303584	2.09126e-06	0.688857
6	3.31351	277157600	563628	81077.3	31.8439	17.4286	0.0020336	14.1632	0.343806	4.36318	0.000216767	391.672	44.1797	511.672	0.000292545	2.10839e-06	0.720707
7	3.32509	278897400	566925	82712.6	33.3275	18.0414	0.00203274	13.7343	0.375459	3.93429	0.000218234	401.088	54.5554	521.088	0.000296563	2.41432e-06	0.814099
							Mean	13.9467		4.14668		418.031		538.031	0.000298492
							2SD			0.492936				33.1207	3.55141
LBS5H
1	3.29332	299858600	605137	235179	90.343	59.2443	0.00201827	6.51855	0.293588		0.000251171	612.551	23.9725		0.000785049	5.65237e-06	0.720002
2	3.29106	293258000	591701	245213	95.8469	62.6913	0.00201768	6.22482	0.370133		0.000257251	651.584	23.3045		0.000834962	4.42249e-06	0.529664
3	3.27768	288592400	582016	240922	94.7375	61.6198	0.00201672	5.74656	0.30458		0.000253238	625.819	23.5813		0.000834793	2.99111e-06	0.358306
4	3.27744	288472200	581667	243058	94.0656	61.6287	0.00201624	5.50718	0.36025		0.000253044	624.579	23.5633		0.000841387	5.33458e-06	0.634022
5	3.2758	288648800	582403	245990	97.5322	60.9658	0.00201549	5.12916	0.308659		0.000249472	601.642	24.8853		0.000852151	4.38203e-06	0.514231
6	3.25765	282362500	569203	236433	90.4593	59.84	0.00201599	5.37901	0.302113		0.000252298	619.787	29.5961		0.000837184	7.49202e-06	0.894907
7	3.24169	290903800	586721	255042	99.9384	63.3892	0.00201674	5.75504	0.442202		0.000248152	593.168	23.1757		0.000877781	3.1165e-06	0.355043
							Mean	5.75147				618.447			0.000837615
							2SD	0.965461				37.8417			6.62368
LBS6H-
1	3.19733	314512600	635663	165168	58.0092	39.4773	0.00202107	7.91542	0.286922		0.000239695	538.874	30.7821		0.000525155	1.25529e-06	0.239032
2	3.19859	314127100	634797	169242	65.0646	39.1143	0.00202109	7.9234	0.326093		0.000231444	485.903	29.5934		0.000538742	2.71438e-06	0.503836
3	3.20531	318200900	643210	177176	67.964	42.5272	0.00202046	7.61171	0.29513		0.000241289	549.106	28.2951		0.000556535	2.30627e-06	0.414398
4	3.20086	316040600	638630	174180	68.6804	40.5567	0.00202073	7.74387	0.391833		0.000232611	493.394	28.8426		0.00055143	2.81984e-06	0.511369
5	3.20289	313822300	634513	172475	67.5683	41.7483	0.00202197	8.36525	0.338261		0.000238432	530.765	28.9843		0.000548989	2.351e-06	0.428242
6	3.19225	317151500	640777	178095	70.8702	42.4829	0.0020206	7.67903	0.285798		0.000238618	531.96	28.4347		0.000562163	3.19479e-06	0.568304
7	3.19788	316977000	640928	148231	57.7505	35.5745	0.002022	8.38021	0.356602		0.000241879	552.896	30.9326		0.000467593	5.82721e-06	1.24622
							Mean	7.94556				526.128			0.000547169
							2SD	0.626968				52.6121			4.8756
LBS7H
1	3.22667	3.04846e+08	615725	494144	191.223	109.729	0.00201979	7.27576	0.287373		0.000222059	425.647	63.4467		0.00162096	1.84726e-05	1.13961
2	3.23465	308612000	623130	490285	190.782	111.508	0.00201914	6.95074	0.394216		0.000227435	460.163	19.9973		0.00158868	1.69758e-05	1.06855
3	3.23309	305256500	616977	450953	175.525	104.167	0.00202121	7.98424	0.342206		0.000229419	472.901	19.6347		0.00147675	1.38208e-05	0.935889
4	3.21408	306341100	618498	489253	196.3	115.476	0.00201899	6.87481	0.30215		0.000236025	515.311	20.5027		0.00159709	2.46937e-05	1.54617
5	3.20461	311049400	628955	185305	74.0794	42.6559	0.00202204	8.39717	0.38177		0.000229043	470.489	28.2496		0.00059611	6.17846e-06	1.03646
6	3.20531	301123100	608045	503128	196.284	116.712	0.00201948	7.11899	0.293134		0.0002321	490.114	17.5242		0.00166984	1.24937e-05	0.7482
7	3.19694	302303900	610862	494781	192.573	113.1	0.00202042	7.59076	0.386482		0.000229891	475.933	17.3153		0.00163845	7.54589e-06	0.46055
							Mean	7.45607				472.937			0.00159863
							2SD	1.132				54.8032			8.31942
